# Supplementary material for: Standardized Versus Tailored Implementation of Measurement-Based Care for Depression in Community Mental Health Clinics
Source: Atypon-hosted journal article supplement (doi:10.1176/appi.ps.202100284), 2022-05-11
Supplement: appi.ps.202100284.ds001.pdf [file appi.ps.202100284.ds001.pdf]

**Table e1**

*Depression Diagnostic Codes for Study Eligibility*

| Diagnostic Code | Description                                                                                     |
|-----------------|-------------------------------------------------------------------------------------------------|
| 293.83          | Depressive Disorder Due To Another Medical Condition With Depressive Features                   |
| 293.83          | Depressive Disorder Due To Another Medical Condition With Major Depressive-Like Episode         |
| 293.83          | Depressive Disorder Due To Another Medical Condition With Mixed Features                        |
| 296.2           | Major Depressive Disorder Single Episode Unspecified                                            |
| 296.2           | Major Depressive Disorder Single Episode Unspecified Degree                                     |
| 296.21          | Major Depressive Disorder Single Episode Mild                                                   |
| 296.21          | Major Depressive Disorder Single Episode Mild Degree                                            |
| 296.22          | Major Depressive Disorder Single Episode Moderate                                               |
| 296.22          | Major Depressive Disorder Single Episode Moderate Degree                                        |
| 296.23          | Major Depressive Disorder Single Episode Severe                                                 |
| 296.23          | Major Depressive Disorder Single Episode Severe Degree Without Mention Of Psychotic Behavior    |
| 296.23          | Major Depressive Disorder Single Episode Severe Without Psychotic Features                      |
| 296.2           | Major Depressive Disorder Single Episode Severe Degree Specified As With Psychotic Behavior     |
| 296.24          | Major Depressive Disorder Single Episode Severe With Psychotic Features                         |
| 296.24          | Major Depressive Disorder Single Episode With Psychotic Features                                |
| 296.2           | Major Depressive Disorder Single Episode In Partial Or Unspecified Remission                    |
| 296.25          | Major Depressive Disorder Single Episode In Partial Remission                                   |
| 296.26          | Major Depressive Disorder Single Episode In Full Remission                                      |
| 296.3           | Major Depressive Disorder Recurrent Episode Unspecified                                         |
| 296.3           | Major Depressive Disorder Recurrent Episode Unspecified Degree                                  |
| 296.3           | Major Depressive Disorder Recurrent Unspecified                                                 |
| 296.31          | Major Depressive Disorder Recurrent Episode Mild                                                |
| 296.31          | Major Depressive Disorder Recurrent Episode Mild Degree                                         |
| 296.31          | Major Depressive Disorder Recurrent Mild                                                        |
| 296.32          | Major Depressive Disorder Recurrent Episode Moderate                                            |
| 296.32          | Major Depressive Disorder Recurrent Episode Moderate Degree                                     |
| 296.32          | Major Depressive Disorder Recurrent Moderate                                                    |
| 296.33          | Major Depressive Disorder Recurrent Episode Severe                                              |
| 296.33          | Major Depressive Disorder Recurrent Episode Severe Degree Without Mention Of Psychotic Behavior |
| 296.33          | Major Depressive Disorder Recurrent Severe Without Psychotic Features                           |
| 296.34          | Major Depressive Disorder Recurrent Episode Severe Degree Specified As With Psychotic Behavior  |
| 296.34          | Major Depressive Disorder Recurrent Episode With Psychotic Features                             |
| 296.3           | Major Depressive Disorder Recurrent Severe With Psychotic Features Specify: Mood-Congruent      |
| 296.35          | Major Depressive Disorder Recurrent Episode In Partial Or Unspecified Remission                 |
| 296.35          | Major Depressive Disorder Recurrent Episode In Partial Remission                                |
| 296.35          | Major Depressive Disorder Recurrent In Partial Remission                                        |
| 296.36          | Major Depressive Disorder Recurrent Episode In Full Remission                                   |
| 296.36          | Major Depressive Disorder Recurrent In Full Remission                                           |
| 296.8           | Atypical Depressive Disorder                                                                    |
| 296.9           | Unspecified Episodic Mood Disorder                                                              |
| 300.4           | Dysthymic Disorder Early Onset With Atypical Features                                           |
| 300.4           | Dysthymic Disorder Early Onset Without Atypical Features                                        |
| 300.4           | Dysthymic Disorder Late Onset With Atypical Features                                            |

|        |                                                           |
|--------|-----------------------------------------------------------|
| 300.4  | Dysthymic Disorder Late Onset Without Atypical Features   |
| 300.4  | Persistent Depressive Disorder (Dysthymia)                |
| 301.13 | Cyclothymic Disorder                                      |
| 311    | Depressive Disorder Nos                                   |
| 311    | Depressive Disorder Not Elsewhere Classified              |
| 311    | Other Specified Depressive Disorder                       |
| 311    | Unspecified Depressive Disorder                           |
| 309    | Adjustment Disorder With Depressed Mood                   |
| 309.28 | Adjustment Disorder With Mixed Anxiety And Depressed Mood |

---

*Note.* Patient depression diagnoses were captured from the EHR for visits between July 1, 2015 and July

31, 2018.

**Table e2**

*Tailored Guidelines*

| Site # | State | Tailored | Target Frequency        | Age Range Specified in Guideline | Diagnoses Specified in Guideline |
|--------|-------|----------|-------------------------|----------------------------------|----------------------------------|
| 1      | TN    | yes      | every session*          | 21-65                            | depression diagnoses             |
| 5      | TN    | yes      | every session           | 12 and older                     | depression diagnoses             |
| 6      | IN    | no       | every session           | 21-65                            | depression diagnoses             |
| 9      | IN    | yes      | every session           | 12 and older                     | any diagnosis                    |
| 10     | IN    | yes      | every session           | 12 and older                     | any diagnosis                    |
| 12     | IN    | yes      | first week of the month | 12 and older                     | depression diagnoses             |

\* This site opted to focus on administration of the PHQ-9 to 10 clients per clinician caseload initially to aid therapists in gaining experience with measurement-based care before expanding efforts to all clients with a depression diagnosis.

**Table e3***Level of Fidelity by Implementation Group*

| Level of Fidelity  | Standardized                     |                           | Tailored                         |                           | All Participants<br>( <i>N</i> = 154) |
|--------------------|----------------------------------|---------------------------|----------------------------------|---------------------------|---------------------------------------|
|                    | Child/Family<br>( <i>n</i> = 27) | Adult<br>( <i>n</i> = 44) | Child/Family<br>( <i>n</i> = 20) | Adult<br>( <i>n</i> = 63) |                                       |
| No PHQ-9 on Record | 77.4%<br>(37.7, 41.0)            | 69.0%<br>(88.1, 69.6)     | 85.8%<br>(39.5, 49.7)            | 67.9%<br>(71.1, 65.3)     | 72.2%<br>(66.0, 63.8)                 |
| PHQ-9 Recorded     | 13.8%<br>(12.0, 26.5)            | 17.3%<br>(28.2, 49.2)     | 9.0%<br>(7.2, 12.2)              | 9.8%<br>(11.4, 25.9)      | 12.6%<br>(15.7, 34.0)                 |
| PHQ-9 Discussed    | 8.7%<br>(7.4, 16.1)              | 13.7%<br>(20.8, 32.1)     | 5.2%<br>(1.7, 2.7)               | 22.4%<br>(31.0, 52.0)     | 15.3%<br>(20.1, 39.4)                 |

*Note.* Percentages (*M n*, *SD n*) for clinician-level of fidelity. Totals for each fidelity category were computed for each clinician in the implementation window, then clinician-level counts were summarized.

**Table e4***Effect of Implementation Group on Patient Depression Symptom Severity*

| Variable               | b (95% CI)      |                 |                   |                 |
|------------------------|-----------------|-----------------|-------------------|-----------------|
|                        | Treatment Model |                 | New Patient Model |                 |
| Intercept              | 12.75           | (11.11 - 14.40) | 12.27             | (10.32 - 14.23) |
| Baseline PHQ-9         | 0.61            | (0.45 - 0.77)   | 0.61              | (0.45 - 0.77)   |
| New Patient            | -0.68           | (-2.45 - 1.09)  | -0.02             | (-2.42 - 2.39)  |
| Tailored               | 1.49            | (-0.54 - 3.51)  | 2.51              | (-0.51 - 5.53)  |
| New Patient x Tailored |                 |                 | -1.56             | (-5.23 - 2.11)  |

*Note: Clinician n=81; Patient n = 228*

**Table e5***Effect of MBC Fidelity on Patient Depression Symptom Severity*

| Variable                               | b (95% CI)         |                 |                               |                 |
|----------------------------------------|--------------------|-----------------|-------------------------------|-----------------|
|                                        | Main Effects Model |                 | New Patient Interaction Model |                 |
| Intercept                              | 14.17              | (12.25 - 16.08) | 14.17                         | (12.06 - 16.27) |
| Baseline PHQ-9                         | 0.60               | (0.44 - 0.76)   | 0.60                          | (0.44 - 0.76)   |
| New Patient                            | -1.14              | (-2.98 - 0.70)  | -1.19                         | (-4.04 - 1.65)  |
| Number of Sessions                     | -0.05              | (-0.45 - 0.35)  | 0.02                          | (-0.59 - 0.63)  |
| Sessions Recorded PHQ-9                | -0.05              | (-0.75 - 0.64)  | 0.16                          | (-0.94 - 1.26)  |
| Sessions Discussed PHQ-9               | -0.24              | (-0.78 - 0.29)  | -0.47                         | (-1.26 - 0.32)  |
| Number of Sessions x New Patient       |                    |                 | -0.07                         | (-0.87 - 0.73)  |
| Sessions Recorded PHQ-9 x New Patient  |                    |                 | -0.47                         | (-1.93 - 0.99)  |
| Sessions Discussed PHQ-9 x New Patient |                    |                 | 0.57                          | (-0.60 - 1.73)  |

*Note: Clinician n=81; Patient n = 228*

## Figure e1a

### Clinician Consort Flowchart

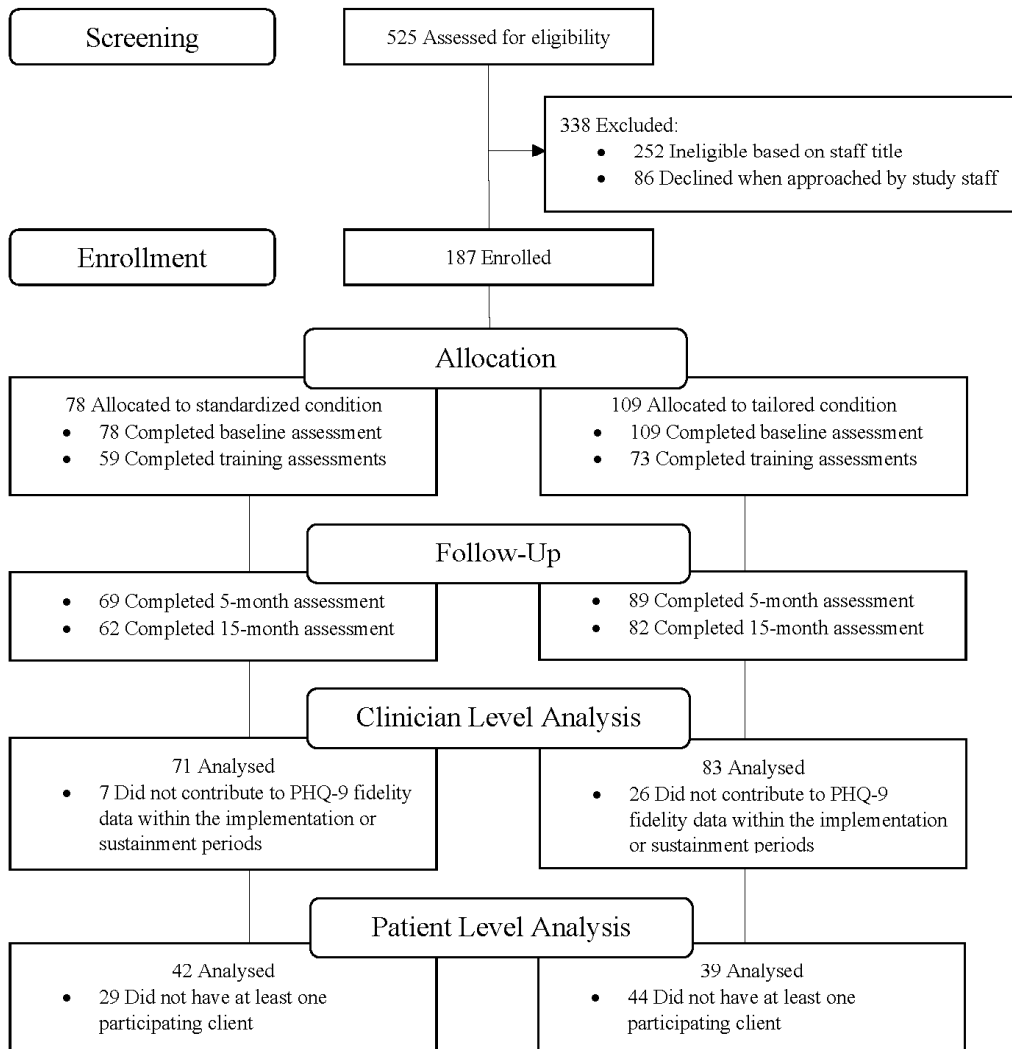

*Note.* Ten clinicians practiced at more than one site during the study period. Only data collected at the first site at which a clinician provided consent was retained in the data.

## Figure e1b

### Patient Consort Flowchart

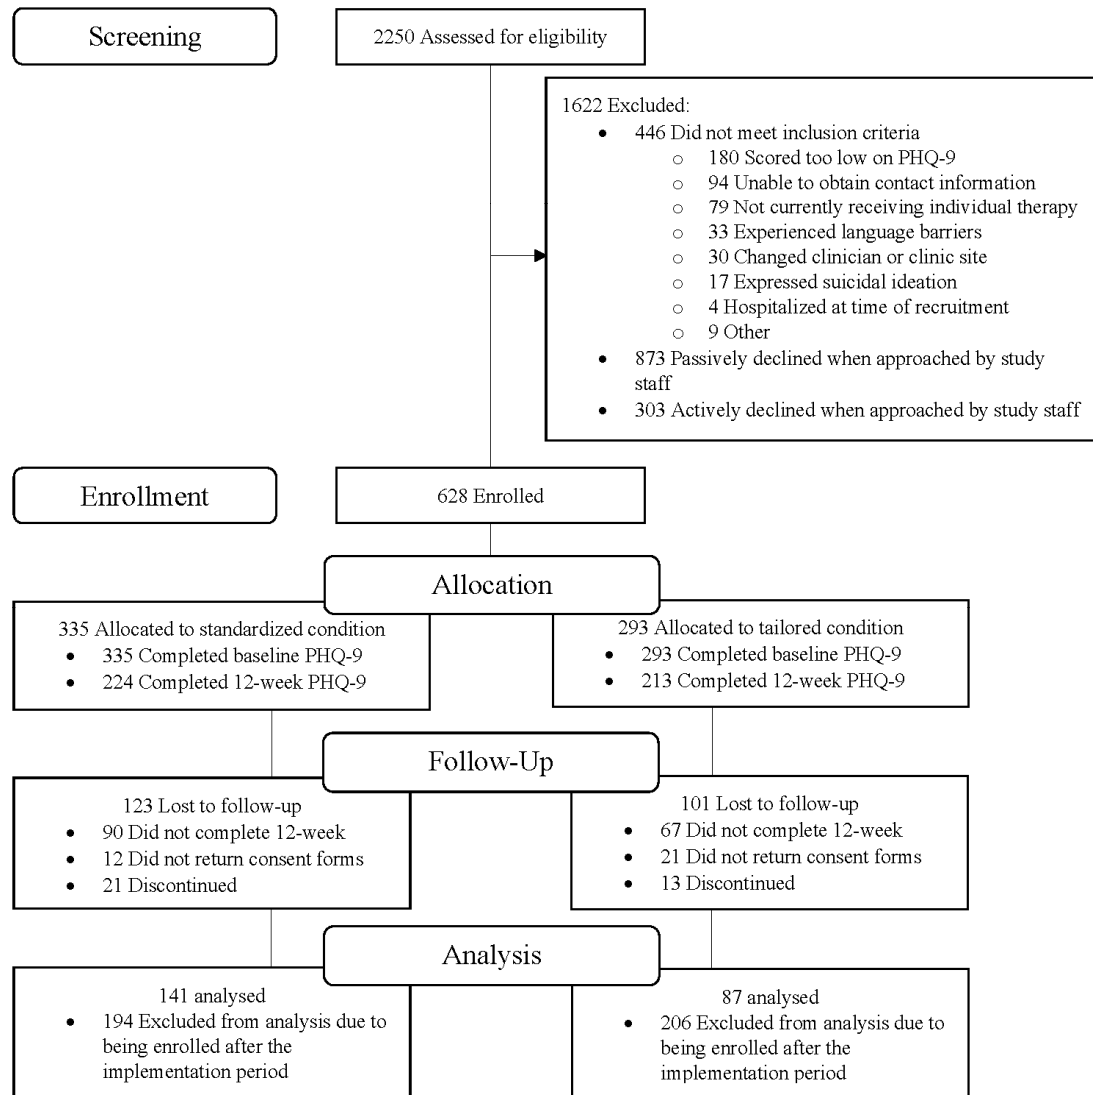

*Note.* Passively declined = patient did not answer the phone during recruitment attempts. Actively declined = patient refused participation in study. Expressing suicidal ideation in the phone interview was initially an exclusion criterion but was later removed, allowing suicidal patients to participate once they had been assessed by a Centerstone staff member for stability.
